# Supplementary material for: Association Between Three-Dimensional Transrectal Ultrasound Findings and Tumor Response to Neoadjuvant Chemoradiotherapy in Locally Advanced Rectal Cancer: An Observational Study
Source: PubMed Central journal article supplement (PMC8223675; doi:10.3389/fonc.2021.648839), 2021-06-04
Supplement: Table_1.pdf [file Table_1.pdf]

**Table S1.** Predicting results and follow-up results of watch-and-wait patients.

| <b>Watch-and-wait patients</b>                    | <b><u>cCR</u> &gt; 12 months<br/>(n = 27)</b> | <b>Regrowth in 12<br/>months (n = 2)</b> | <b>Total (n = 29)</b> |
|---------------------------------------------------|-----------------------------------------------|------------------------------------------|-----------------------|
| <b>Predicting model determined <u>cCR</u></b>     | <b>24</b>                                     | <b>2</b>                                 | <b>26</b>             |
| <b>Predicting model determined <u>non-cCR</u></b> | <b>3</b>                                      | <b>0</b>                                 | <b>3</b>              |
